# Supplementary material
Source: publisher site journal article supplement (https://www.dovepress.com/article/606990)
Supplement: Supplementary file 1 [file 606990%20Supplementary%20Material.docx]

# Supplementary table S1. Item-level comparisons of the Occupational Balance Questionnaire (OBQ-11):

| **OBQ-11 Item** | **Controls (n = 60) Mean ± SD** | **Endometriosis (n = 43) Mean ± SD** | **Cohen’s d** | **95% CI** |
| --- | --- | --- | --- | --- |
| In a typical week, I feel there are just enough things to do | 2.13 ± 0.75 | 1.37 ± 0.66 | 1.07 | 0.65–1.49 |
| I make sure I do things I really want to do | 2.05 ± 0.59 | 1.37 ± 0.69 | 1.06 | 0.65–1.48 |
| I have enough time to do the things that I must do | 1.70 ± 0.77 | 1.16 ± 0.62 | 0.76 | 0.35–1.16 |
| I am satisfied with the number of activities that I take part in | 1.78 ± 0.72 | 1.26 ± 0.62 | 0.78 | 0.37–1.18 |
| I have a balance among my physical, social, intellectual and restful activities | 1.72 ± 0.87 | 1.16 ± 0.65 | 0.71 | 0.30–1.11 |
| I am satisfied with the amount of time that I spend relaxing, recovering, and sleeping | 1.57 ± 0.85 | 1.07 ± 0.59 | 0.66 | 0.26–1.06 |
| There is enough variation between things that I must do and things that I want to do | 1.63 ± 0.76 | 1.28 ± 0.59 | 0.51 | 0.11–0.91 |
| There is a balance between activities that give me energy versus those that drain my energy | 1.40 ± 0.76 | 1.00 ± 0.49 | 0.60 | 0.20–1.00 |

Item-level group differences between women with endometriosis and control participants on the OBQ-11. Values are presented as mean ± SD. Higher scores indicate better occupational balance. Effect sizes are reported as Cohen’s d with 95% confidence intervals.

Effect sizes are reported as Cohen’s d with 95% confidence intervals.

## Supplementary tables. Domain-specific mediation analyses of executive functions in the associations between disease burden and quality of life in women with Endometriosis:

## Supplementary Table S2. Mediation analyses of executive functions in the association between pain catastrophizing and quality of life domains (endometriosis group, n = 43)

_____________________________________________________________________________________________________

| **QoL domain** | **Path a: PCS → EF (B, p)** | **Path b: EF → QoL (B, p)** | **Direct effect (c′) (B, p)** | **Indirect effect (B)** | **95% Bootstrapped CI** |
| --- | --- | --- | --- | --- | --- |
| Physical | 1.04, p=.001 | −0.46, p=.002 | 0.03, p=.93 | −0.48 | [−0.84, −0.12] |
| Psychological | 1.04, p=.001 | −0.67, p<.001 | 0.10, p=.67 | −0.69 | [−1.16, −0.29] |
| Social | 1.04, p=.001 | −0.54, p=.006 | −0.38, p=.33 | −0.56 | [−1.10, −0.19] |
| Environmental | 1.04, p=.001 | −0.70, p<.001 | −0.21, p=.41 | −0.73 | [−1.23, −0.30] |

Note. PCS = Pain Catastrophizing Scale; EF = Executive Functions (BDEFS total); QoL = Quality of Life (WHOQOL-BREF domains). Indirect effects estimated using 5,000 bootstrap samples.

## Supplementary Table S3. Mediation analyses of executive functions in the association between emotional distress and quality of life domains (endometriosis group, n = 43)

________________________________________________________________________________________________________

| **QoL domain** | **Path a: DASS → EF (B, p)** | **Path b: EF → QoL (B, p)** | **Direct effect (c′) (B, p)** | **Indirect effect (B)** | **95% Bootstrapped CI** |
| --- | --- | --- | --- | --- | --- |
| Physical | 0.95, p<.001 | −0.39, p=.033 | −0.10, p=.66 | −0.37 | [−0.61, 0.17] |
| Psychological | 0.95, p<.001 | −0.71, p<.001 | 0.12, p=.50 | −0.68 | [−0.87, −0.31] |
| Social | 0.95, p<.001 | −0.57, p=.027 | −0.12, p=.70 | −0.53 | [−1.09, −0.13] |
| Environmental | 0.95, p<.001 | −0.86, p<.001 | 0.18, p=.37 | −0.82 | [−1.11, −0.35] |

Note. Emotional distress assessed using DASS-21 total score; EF = Executive Functions (BDEFS total); QoL = Quality of Life (WHOQOL-BREF domains). Indirect effects estimated using 5,000 bootstrap samples.
